# Supplementary material for: Pulmonary Embolism (PE) to Chronic Thromboembolic Pulmonary Disease (CTEPD): Findings from a Survey of UK Physicians
Source: MDPI journal article supplement (doi:10.3390/arm92010007), 2024-01-09
Supplement: s1 [file s1]

# SUPPLEMENTARY MATERIALS

**Table S1.** General management of PE in the centres in which the respondents practice.

|                                                                                    | Cardiology<br>(n = 50) | Respiratory<br>Medicine<br>(n = 50) | Haematology<br>(n = 25) | Internal<br>Medicine<br>(n = 50) | Overall<br>(N = 175) |
|------------------------------------------------------------------------------------|------------------------|-------------------------------------|-------------------------|----------------------------------|----------------------|
| Local guidelines on PE management at the centre (work setting), n (%)              |                        |                                     |                         |                                  |                      |
| Yes                                                                                | (88)                   | (92)                                | (92)                    | (86)                             | (89)                 |
| No                                                                                 | (12)                   | (6)                                 | (4)                     | (12)                             | (9)                  |
| Not sure                                                                           | (0)                    | (2)                                 | (4)                     | (2)                              | (2)                  |
| PERT at the centre (work setting), n (%)                                           |                        |                                     |                         |                                  |                      |
| Yes                                                                                | (40)                   | (54)                                | (48)                    | (14)                             | (38)                 |
| No                                                                                 | (54)                   | (40)                                | (36)                    | (70)                             | (52)                 |
| Not sure                                                                           | (6)                    | (6)                                 | (16)                    | (16)                             | (10)                 |
| Hospital runs a dedicated clinic for the follow-up of acute PE, n (%) <sup>†</sup> |                        |                                     |                         |                                  |                      |
| Yes, for all patients*                                                             | (44)                   | (66)                                | (52)                    | (42)                             | (51)                 |
| Yes, for hospital-admitted patients only                                           | (22)                   | (10)                                | (16)                    | (10)                             | (14)                 |
| No                                                                                 | (26)                   | (22)                                | (24)                    | (36)                             | (27)                 |
| Not sure                                                                           | (8)                    | (2)                                 | (8)                     | (12)                             | (7)                  |

\* Including low-risk, outpatient-managed patients. <sup>†</sup> Of those managed as outpatients at the physician's centre.

PE = pulmonary embolism; PERT = pulmonary embolism response team.

**Table S2.** Respondents' access to imaging modalities.

|                                                      | Cardiology      | Respiratory     | Haematology     | Internal        | Overall          |
|------------------------------------------------------|-----------------|-----------------|-----------------|-----------------|------------------|
|                                                      |                 | Medicine        |                 | Medicine        |                  |
|                                                      | (n = 50)        | (n = 50)        | (n = 25)        | (n = 50)        | (N = 175)        |
| <b>Computed tomography, n</b>                        | <b>(n = 50)</b> | <b>(n = 50)</b> | <b>(n = 25)</b> | <b>(n = 50)</b> | <b>(n = 175)</b> |
| CTPA only                                            | 41              | 31              | 22              | 45              | 139              |
| CTPA plus DECT                                       | 9               | 18              | 2               | 3               | 32               |
| CTPA plus LSIM                                       | 3               | 11              | 1               | 1               | 16               |
| Not sure which CT modalities, if any, are available  | 0               | 0               | 0               | 2               | 2                |
| <b>Magnetic resonance imaging</b>                    | <b>(n = 41)</b> | <b>(n = 40)</b> | <b>(n = 21)</b> | <b>(n = 34)</b> | <b>(n = 136)</b> |
| Pulmonary angiography                                | 26              | 30              | 14              | 20              | 90               |
| Lung perfusion mapping                               | 18              | 22              | 7               | 5               | 52               |
| Not sure which MRI modalities, if any, are available | 11              | 7               | 5               | 13              | 36               |
| <b>Nuclear medicine</b>                              | <b>(n = 49)</b> | <b>(n = 47)</b> | <b>(n = 23)</b> | <b>(n = 48)</b> | <b>(n = 167)</b> |
| Q scan only                                          | 7               | 4               | 0               | 6               | 17               |
| V/Q scanning                                         | 38              | 39              | 22              | 36              | 135              |
| SPECT                                                | 14              | 15              | 3               | 6               | 38               |

|                                                                   |                 |                 |                |                 |                 |
|-------------------------------------------------------------------|-----------------|-----------------|----------------|-----------------|-----------------|
| Not sure which nuclear medicine modalities, if any, are available | 1               | 2               | 1              | 5               | 9               |
| <b>Other</b>                                                      | <b>(n = 15)</b> | <b>(n = 10)</b> | <b>(n = 4)</b> | <b>(n = 11)</b> | <b>(n = 40)</b> |
| Conventional pulmonary angiography/DSA                            | 14              | 10              | 4              | 11              | 39              |
| Other                                                             | 2               | 0               | 0              | 0               | 2               |

---

CT = computed tomography; CTPA = computed tomography pulmonary angiography; DECT = dual-energy computed tomography; DSA = digital subtraction angiography; LSIM = lung subtraction iodine mapping; MRI = magnetic resonance imaging; Q = perfusion; SPECT = single-photon emission computed tomography; V/Q = ventilation/perfusion.

**Table S3.** Experience in evaluating suspected CTEPD after PE by specialty.

|                                                                                                          | Cardiologists | Respiratory<br>Medicine | Haematologists | Internal Medicine<br>Specialists | Overall   |
|----------------------------------------------------------------------------------------------------------|---------------|-------------------------|----------------|----------------------------------|-----------|
|                                                                                                          | (n = 50)      | (n = 50)                | (n = 25)       | (n = 50)                         | (N = 175) |
| Do you know where your regional PH centre is to<br>refer your CTEPD patients? (%)                        |               |                         |                |                                  |           |
| Yes                                                                                                      | 92            | 78                      | 72             | 74                               | 80        |
| No                                                                                                       | 8             | 22                      | 28             | 26                               | 20        |
| Do you consider your centre to have a protocol for<br>the investigation of CTEPD following acute PE? (%) |               |                         |                |                                  |           |
| Yes                                                                                                      | 52            | 58                      | 44             | 32                               | 47        |
| No                                                                                                       | 30            | 30                      | 24             | 30                               | 29        |
| Not sure                                                                                                 | 18            | 12                      | 32             | 38                               | 24        |

CTEPD = chronic thromboembolic pulmonary disease; PE = pulmonary embolism; PH = pulmonary hypertension.

**Table S4.** Experience in evaluating suspected CTEPD after PE by region.

|                                                                                | Yes (%) | No (%) |
|--------------------------------------------------------------------------------|---------|--------|
| Do you know where your regional PH centre is to refer your CTEPD patients? (%) |         |        |
| Northeast (n = 7)                                                              | 86      | 14     |
| Northwest (n = 20)                                                             | 80      | 20     |
| East Midlands (n = 17)                                                         | 59      | 41     |
| West Midlands (n = 18)                                                         | 89      | 11     |
| Yorkshire and the Humber (n = 11)                                              | 100     | 0      |
| Southeast England (n = 15)                                                     | 53      | 47     |
| Southwest (n = 12)                                                             | 83      | 17     |
| East of England (n = 14)                                                       | 79      | 21     |
| London (n = 47)                                                                | 83      | 17     |
| Scotland (n = 9)                                                               | 89      | 11     |
| Wales (n = 4)                                                                  | 100     | 0      |
| Northern Ireland (n = 1)                                                       | 100     | 0      |

CTEPD = chronic thromboembolic pulmonary disease; PE = pulmonary embolism; PH = pulmonary hypertension.

**Table S5.** Criteria for referring patients to a specialist PH service in the centres in which the respondents practice.

|                                                                                                                  | Cardiology<br>(n = 50) | Respiratory Medicine<br>(n = 50) | Haematology<br>(n = 25) | Internal Medicine<br>(n = 50) | Overall<br>(N = 175) |
|------------------------------------------------------------------------------------------------------------------|------------------------|----------------------------------|-------------------------|-------------------------------|----------------------|
| Persistent symptoms after 3 months of anticoagulation, before conducting further tests                           | 44%                    | 48%                              | 32%                     | 38%                           | 42%                  |
| Persistent symptoms after a PE even if echocardiogram and other tests are normal                                 | 42%                    | 38%                              | 44%                     | 30%                           | 38%                  |
| Persistent symptoms and abnormal investigations, such as Q scan, CTPA and CPET, but with a normal echocardiogram | 56%                    | 66%                              | 36%                     | 40%                           | 51%                  |
| If the echocardiogram shows PH or right heart dilatation                                                         | 50%                    | 78%                              | 80%                     | 62%                           | 66%                  |
| Only patients without significant comorbid conditions                                                            | 2%                     | 10%                              | 0%                      | 4%                            | 5%                   |
| I don't refer the patient to a specialist PH service                                                             | 6%                     | 0%                               | 4%                      | 14%                           | 6%                   |

CPET = cardiopulmonary exercise test; CTPA = computed tomography pulmonary angiogram; PE = pulmonary embolism; PH = pulmonary hypertension; Q = perfusion.

**Table S6.** Relative strengths and weaknesses of imaging modalities in the context of PH

| Variable                                   | Chest Radiography | V/Q Scan                                                     | SPECT/CT V/Q                | Single-Energy CT                          | Dual-Energy CT                                    | MRI                                                    | Pulmonary                |
|--------------------------------------------|-------------------|--------------------------------------------------------------|-----------------------------|-------------------------------------------|---------------------------------------------------|--------------------------------------------------------|--------------------------|
|                                            |                   |                                                              |                             | Angiography <sup>#</sup>                  | Angiography                                       |                                                        | Angiography              |
| <b>PH detection</b>                        | +                 | –                                                            | –                           | +                                         | +                                                 | +                                                      | –                        |
| <b>Evaluation of anatomic compartments</b> |                   |                                                              |                             |                                           |                                                   |                                                        |                          |
| Lung                                       | +                 | —                                                            | +                           | +++                                       | +++                                               | –                                                      | –                        |
| Cardiac chambers                           | +                 | –                                                            | –                           | ++                                        | ++                                                | +++                                                    | –                        |
| Pulmonary vessels                          | +                 | +                                                            | +                           | +++                                       | ++++                                              | ++                                                     | ++                       |
| Mediastinum                                | –                 | –                                                            | –                           | +++                                       | +++                                               | +++                                                    | –                        |
| <b>Assessment of PH aetiology</b>          | ++                | ++                                                           | ++                          | +++                                       | ++++                                              | ++                                                     | ++                       |
| <b>General strengths</b>                   | Readily available | Screening for CTEPH;<br>SPECT currently replacing planar V/Q | Combined evaluation of lung | Excellent evaluation of aetiologies of PH | Assessment of anatomy and lung perfusion (iodine) | No radiation; excellent evaluation of cardiac function | Planning of endovascular |

|                                                       |                                                   |                                                                                                                                   |                                                                                                    |                                                                                                                                      |                                                            |                                                                                                                    |                                                                         |
|-------------------------------------------------------|---------------------------------------------------|-----------------------------------------------------------------------------------------------------------------------------------|----------------------------------------------------------------------------------------------------|--------------------------------------------------------------------------------------------------------------------------------------|------------------------------------------------------------|--------------------------------------------------------------------------------------------------------------------|-------------------------------------------------------------------------|
|                                                       |                                                   |                                                                                                                                   | parenchyma with<br>lung perfusion                                                                  |                                                                                                                                      | maps) in a single<br>test                                  | and pulmonary<br>flow in one<br>examination                                                                        | treatment (PEA,<br>BPA)                                                 |
| <b>Weaknesses</b>                                     | Limited role in the<br>assessment of<br>aetiology | Need further imaging<br>to assess the cause of<br>PH; interpretive<br>limitations in test<br>patients with<br>comorbid conditions | Lung assessment<br>limited; needs<br>more validation;<br>radiation dose<br>added with use of<br>CT | Limited<br>haemodynamic<br>assessment;<br>limited evaluation<br>of distal<br>pulmonary<br>arteries (beyond<br>subsegmental<br>level) | Needs validation for<br>all dual-energy CT<br>technologies | Limited in the<br>evaluation of lung<br>parenchyma; not<br>widely available;<br>more technical<br>expertise needed | Absence of<br>perivascular<br>structure<br>evaluation;<br>invasive test |
| <b>Average effective radiation<br/>exposure (mSv)</b> | 0.05                                              | 2.2                                                                                                                               | 2.6–3.5                                                                                            | 2–5                                                                                                                                  | 3–5                                                        | None                                                                                                               | 10–30                                                                   |

Reproduced from Remy-Jardin et al. [18].

BPA = balloon pulmonary angioplasty; CTEPH = chronic thromboembolic pulmonary hypertension; PEA = pulmonary endarterectomy; PH = pulmonary hypertension; V/Q scan = ventilation–perfusion scintigraphy.

– = no utility, + = limited utility, ++ = moderately useful, +++ = useful, and ++++ = very useful. # Non-electrocardiogram-gated CT.



**Figure S1.** Possible reasons for persistent dyspnoea following PE ranked in order of likelihood by respondents.

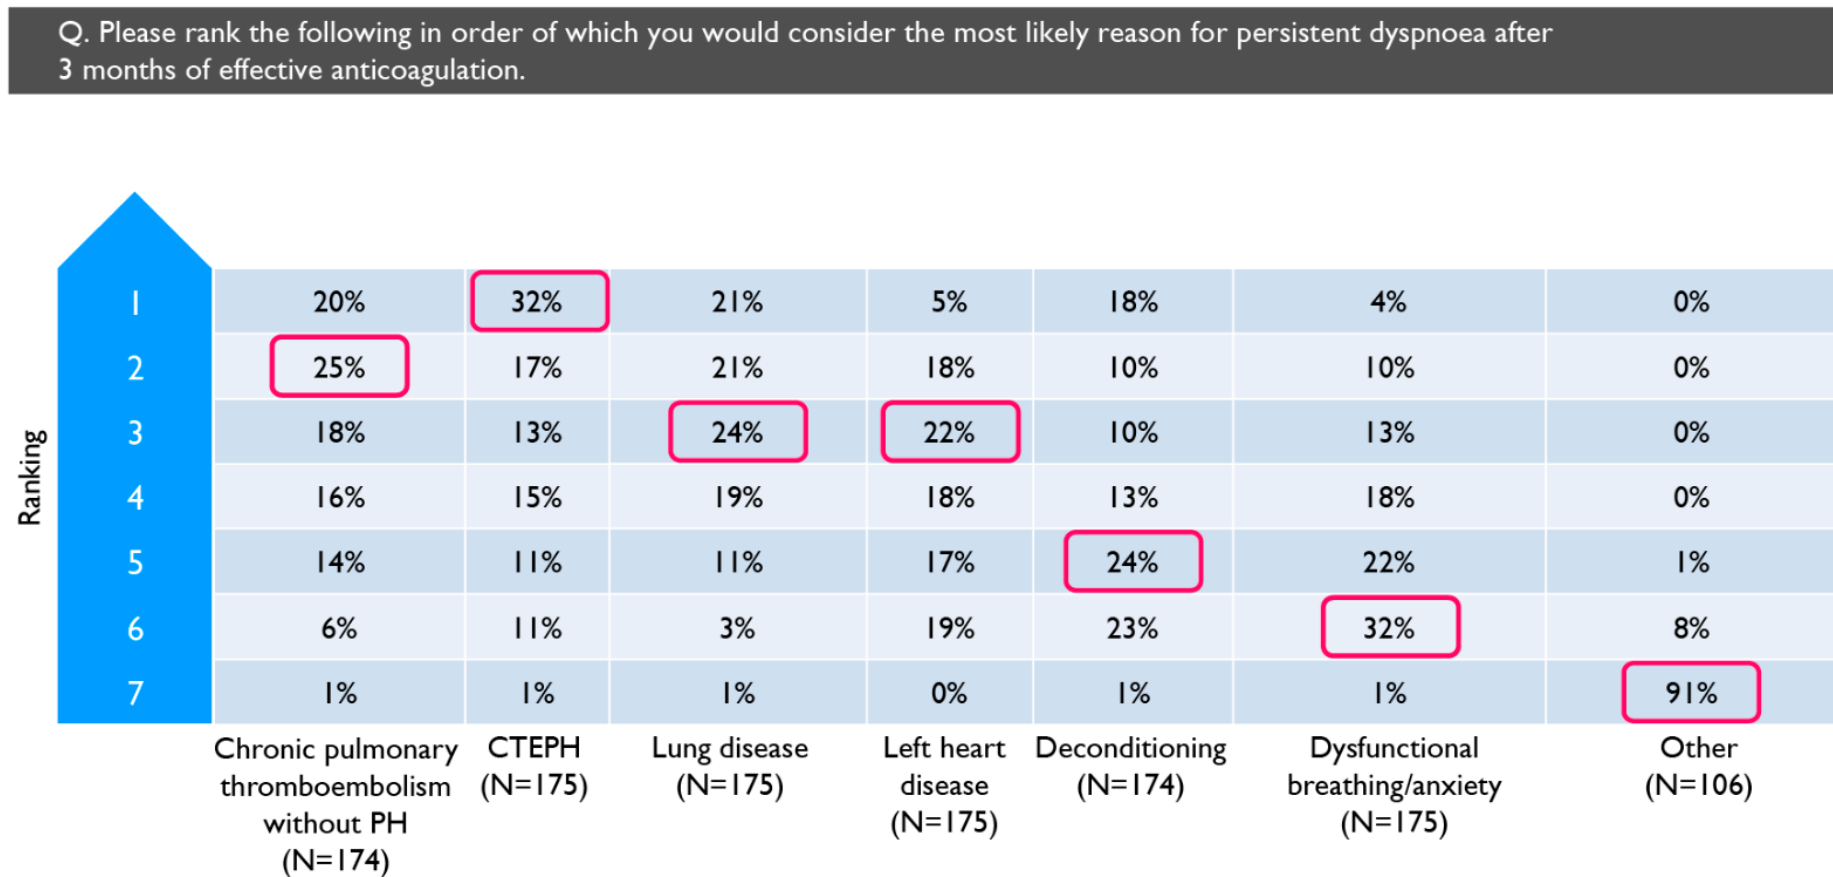

CTEPH = chronic thromboembolic pulmonary hypertension; PE = pulmonary embolism; PH = pulmonary hypertension.

**Figure S2.** Use of risk score calculators for estimating probability of CTEPH by respondents.

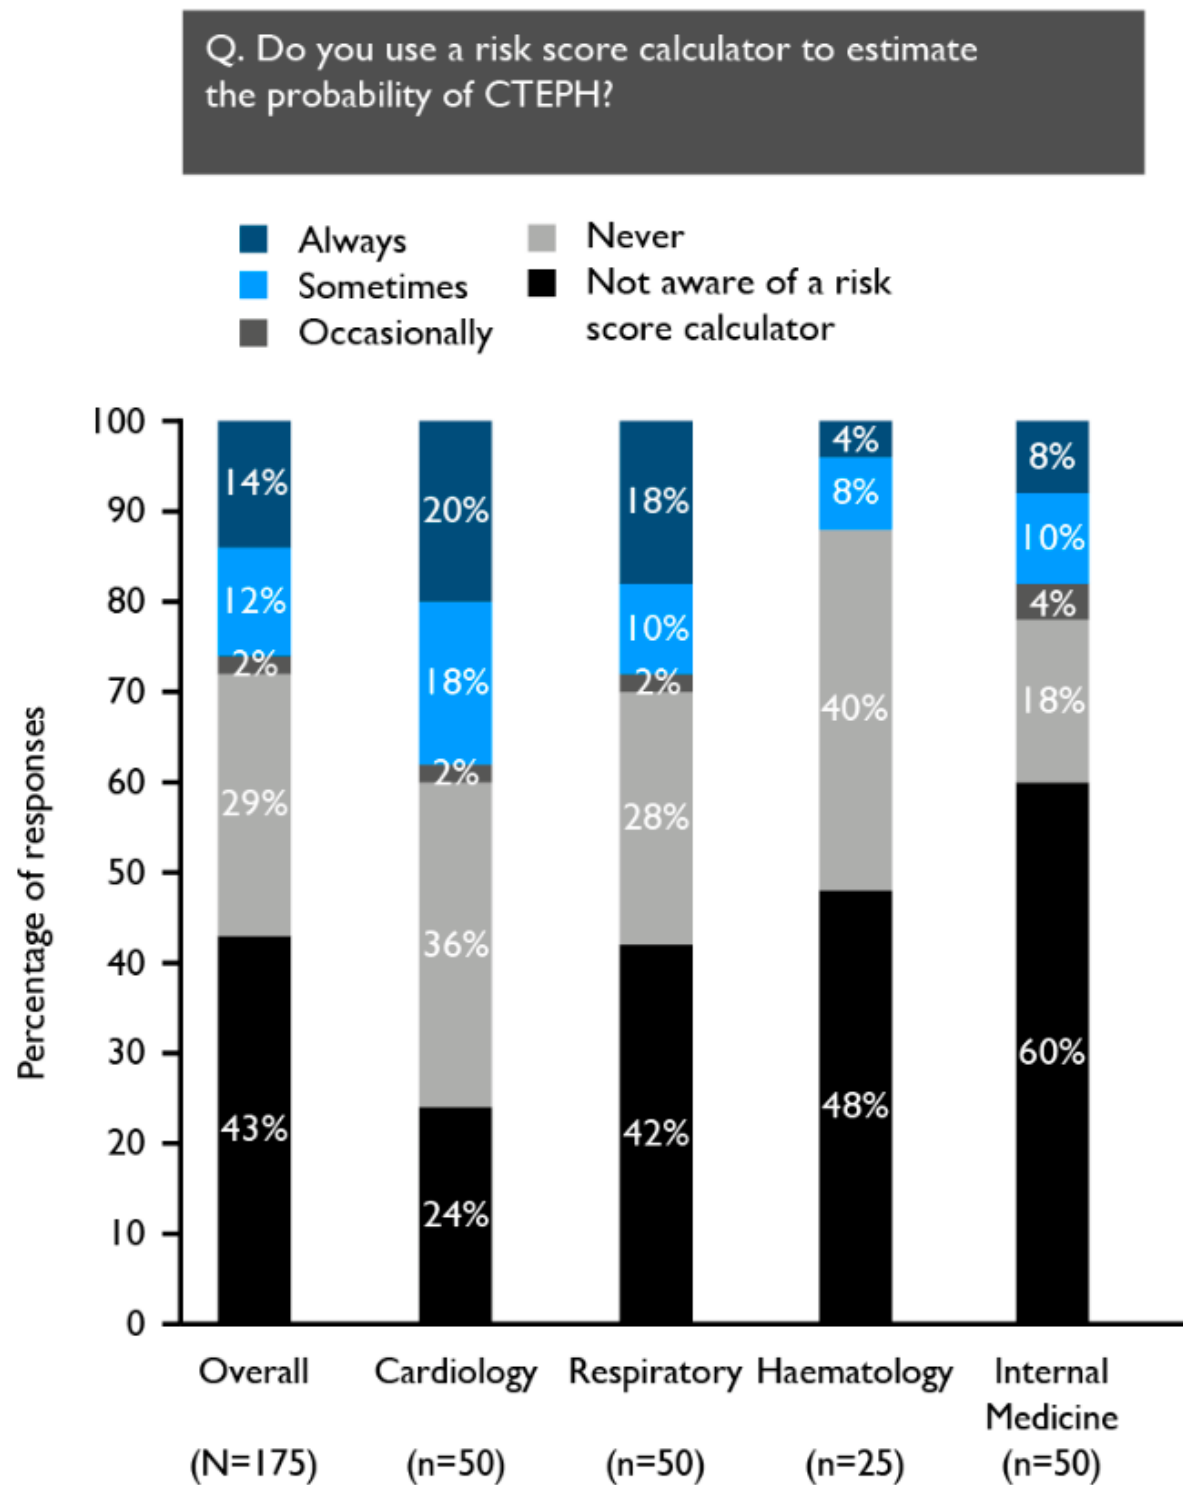

CTEPH = chronic thromboembolic pulmonary hypertension.
